# Supplementary material
Source: publisher figshare collection journal article supplement (https://gsapubs.figshare.com/ndownloader/files/23318642)
Supplement: Supplementary file 1 [file 23318642]

## Sheet: Ichilula1.csv
576.36	0.37	575.99	THICKNESS	LITHOLOGY	GRAIN_SIZE	BED_FORM	TOP	NOTES	COLOR	OTHER	SAMPLE	LAYER	SAMP_HEIGHT	UPDATED_HEIGHT	MEASUREMENT	LAYER	SAMP_HEIGHT	UPDATED_HEIGHT	MAGSUS
		0	0.36	ls	oo	sup; skl						1	0.02	0.02		3	2.56	2.56	0.0001073
		0	1.8	COVER								1	0.34	0.34		3	2.96	2.96	0.0001236
		0	1.13	si	shl				purple			3	2.36	2.36		3	3.26	3.26	7.9e-05
		0	0.02	si	shl				green			11	6.89	6.89		5	3.56	3.56	0.0001078
		0	0.95	si	shl				purple			13	7.1	7.1		5	3.86	3.86	9.74e-05
		0	0.01	ash	ash			update				15	11.15	11.15		5	4.16	4.16	0.000135
		0	0.44	si	shl				purple			16	11.19	11.19		7	4.46	4.46	0.0001396
		0	0.04	ls	rib							18	11.57	11.57		9	4.76	4.76	0.0001223
		0	1.09	si	shl				purple			22	14.35	14.35		9	5.06	5.06	0.0001274
		0	1.03	COVER								28	16	16		9	5.36	5.36	0.0001232
		0	0.08	ls	rib							29	16.19	16.19		9	5.66	5.66	0.00012
		0	0.14	ls	oo							33	19.17	19.17		10	5.96	5.96	0.0001319
		0	0.06	ls	grn	trg						37	23.8	23.8		14	8.26	8.26	0.0001332
		0	1.11	COVER								40	24.06	24.06		15	8.56	8.56	0.0001362
		0	2.87	si	shl				purple			43	28.34	28.34		15	8.86	8.86	0.0001247
		0	0.04	ls	grn							44	29.03	29.03		15	9.16	9.16	0.0001223
		0	0.05	si	slt				green			48	29.26	29.26		15	9.46	9.46	0.0001405
		0	0.47	si	shl				purple			52	29.26	29.26		15	9.76	9.76	0.0001421
		0	0.03	ls	rib							80	34.93	34.93		15	10.06	10.06	0.00014
		0	2.1	COVER								84	35.2	35.2		15	10.36	10.36	0.0001328
		0	0.52	si	shl				purple			88	36.46	36.46		15	10.66	10.66	0.0001586
		0	0.16	ls	strm							92	36.78	36.78		15	10.96	10.96	0.0001223
		0	0.03	ls	rib							96	36.95	36.95		18	11.57	11.57	0.0001418
		0	0.04	si	shl							100	38.33	38.33		21	13.92	13.92	0.0002695
		0	0.07	ls	grn	skl; trg						104	38.52	38.52		21	14.23	14.23	0.0001409
		0	0.09	ls	rib							107	38.75	38.75		27	15.11	15.11	7.42e-05
		0	1.25	si	shl							125	43.08	43.08		27	15.43	15.43	9.69e-05
		0	0.12	si	slt	vug; crk						126	43.3	43.3		27	15.75	15.75	0.000142
		0	0.1	si	slt	mc; crk						128	47.09	47.09		32	17.01	17.01	0.0001423
		0	0.26	si	shl							132	51.63	51.63		32	17.31	17.31	0.00013
		0	0.55	COVER								134	53.26	53.26		32	17.61	17.61	0.0001529
		0	1.98	si	shl							140	55.9	55.9		32	17.91	17.91	0.0001534
		0	0.25	ls	grn							141	56.08	56.08		36	22.85	22.85	0.0001416
		0	0.04	ls	rib							146	57.63	57.63		36	23.15	23.15	0.0001501
		0	0.9	COVER								147	58.53	58.53		36	23.5	23.5	0.0001327
		0	3.6	si	shl				purple			149	58.66	58.66		36	23.6	23.6	0.0001187
		0	0.16	ls	strm							161	61.18	61.18		42	25.6	25.6	0.0001058
		0	0.06	ls	rib							163	61.36	61.38		42	25.9	25.9	0.0001045
		0	0.04	si	shl							165	61.52	61.54		42	26.2	26.2	0.0001
		0	0.05	ls	rib							172	64.04	64.06		42	27.05	27.05	0.0001038
		0	1.5	COVER								172	64.33	64.35		42	27.45	27.45	9.71e-05
		0	2.75	si	shl		scr					173	64.56	64.58		42	27.55	27.55	0.0001086
		0	0.46	ls	rib							173	64.72	64.74		42	27.95	27.95	0.0001105
		0	0.25	ls	oo	sup						175	64.83	64.85		57	29.94	29.94	9.14e-05
		0	0.03	si	shl							180	65.08	65.1		59	30.2	30.2	7.57e-05
		0	0.14	ls	rib							182	66.15	66.17		61	30.56	30.56	0.0001089
		0	0.02	si	shl							182	66.75	66.77		69	31.12	31.12	9.01e-05
		0	0.08	ls	rib							183	66.91	66.93		77	31.93	31.93	0.0001075
		0	0.04	si	shl							185	67.26	67.28		77	32.31	32.31	0.00011915
		0	0.07	ls	rib							185	67.25	67.27		77	32.66	32.66	0.00019475
		0	0.02	si	shl							187	67.79	67.81		77	32.86	32.86	0.00016395
		0	0.17	ls	rib							189	68.08	68.1		77	33.16	33.16	0.00015175
		0	0.03	si	shl							193	68.3	68.32		77	33.66	33.66	0.00015455
		0	0.03	ls	rib							196	70.12	70.14		77	34.26	34.26	0.00018255
		0	0.03	si	shl							199	70.4	70.42		77	34.46	34.46	0.00016695
		0	0.08	ls	rib							205	70.72	70.74		77	34.71	34.71	0.0001223
		0	0.2	si	shl							209	70.85	70.87		87	35.68	35.68	0.00013245
		0	0.08	ls	rib							211	74.01	74.03		87	36	36	0.0001365
		0	0.2	si	shl							215	74.21	74.23		87	36.36	36.36	0.00013275
		0	0.14	ls	rib							229	77.83	77.85		99	37.34	37.34	0.00012475
		0	0.23	si	shl							231	79.2	79.22		99	37.64	37.64	0.0001182
		0	0.08	ls	rib							231	79.44	79.46		99	38.04	38.04	0.00012585
		0	0.02	si	shl							233	80.03	80.05		100	38.34	38.34	0.00013355
		0	0.13	ls	rib							233	80.49	80.51		108	39.06	39.06	8.59e-05
		0	0.02	si	shl							237	82.65	82.67		108	39.4	39.4	8.735e-05
		0	0.09	ls	rib							237	82.83	82.85		114	39.9	39.9	0.00011025
		0	0.01	si	shl							237	83.18	83.2		114	40.2	40.2	0.0001802
		0	0.09	ls	rib							237	83.5	83.52		127	43.3	43.3	0.0001188
		0	0.21	si	shl							237	83.76	83.78		127	43.6	43.6	0.00013825
		0	0.13	ls	rib							246	85.67	85.69		127	43.62	43.62	0.0001309
		0	0.03	si	shl							248	85.86	85.88		127	43.92	43.92	0.00016675
		0	0.02	ls	rib							250	86.06	86.08		127	44.2	44.2	0.00012215
		0	0.05	si	shl							252	86.18	86.2		127	44.22	44.22	0.00018365
		0	0.03	ls	rib							254	86.3	86.32		127	44.5	44.5	0.0001146
		0	0.04	si	shl							256	86.71	86.73		127	44.52	44.52	0.0001522
		0	0.02	ls	rib							258	87.17	87.19		127	44.82	44.82	0.0001745
		0	3.2	si	shl							259	87.43	87.45		127	45.12	45.12	0.0001695
		0	0.04	ls	oo							262	91.9	92.92		127	45.4	45.4	0.0001648
		0	0.04	ls	rib							264	92.06	93.08		127	45.7	45.7	0.0001589
		0	0.05	ls	grn							267	95.83	96.85		127	46	46	0.0001663
		0	0.04	ls	rib							269	96.01	97.03		127	46.3	46.3	0.00016
		0	0.13	ls	oo							272	96.15	97.17		127	46.9	46.9	0.0001652
		0	0.05	ls	rib							275	98.26	99.28		129	47.39	47.39	0.0001405
		0	0.07	ls	oo							275	98.58	99.6		129	47.69	47.69	0.0001516
		0	0.04	si	shl							278	101.93	102.95		129	47.99	47.99	0.0001368
		0	0.08	ls	oo							280	102.04	103.06		129	48.29	48.29	0.0001549
		0	1.09	si	shl							282	102.96	103.98		129	48.59	48.59	0.0001736
		0	0.11	ls	mic	skl						283	103.21	104.23		129	48.89	48.89	0.0001473
		0	0.04	si	shl							297	108.4	109.42		129	49.19	49.19	0.0001485
		0	0.05	ls	rib							299	108.61	109.63		129	49.36	49.36	0.0001231
		0	0.13	si	shl							301	108.73	109.75		129	49.76	49.76	0.0001474
		0	0.03	ls	rib							301	108.92	109.94		129	50.06	50.06	0.0001439
		0	0.04	si	shl							303	109.31	110.23		131	50.36	50.36	0.0001373
		0	0.05	ls	rib							307	109.77	110.69		131	50.66	50.66	0.0001467
		0	0.04	si	shl							309	110.56	111.48		131	50.96	50.96	0.0001443
		0	0.05	ls	rib							311	111.35	112.27		131	51.26	51.26	0.000144
		0	0.01	si	shl							314	111.68	112.6		133	52.05	52.05	0.0001393
		0	0.08	ls	rib							316	111.82	112.84		133	52.25	52.25	0.0001293
		0	1.23	si	slt							319	111.56	112.58		133	52.45	52.45	0.00014
		0	0.06	ls	rib							321	116.78	117.8		133	52.65	52.65	0.0001283
		0	0.03	si	shl							325	117.18	118.2		133	52.85	52.85	0.0001449
		0	0.04	ls	rib							329	121.33	122.35		133	53.05	53.05	0.0001247
		0	0.07	si	shl							331	121.99	123.01		138	53.84	53.84	0.0001418
		0	0.05	ls	rib							333	122.07	123.09		138	54.14	54.14	0.0001316
		0	0.06	si	shl							335	122.13	123.15		138	54.44	54.44	0.0001498
		0	0.05	ls	oo							345	132.88	133.9		138	54.74	54.74	0.0001616
		0	0.11	ls	rib							353	140.52	141.64		138	55.04	55.04	0.0001517
		0	0.78	si	shl				black			353	140.49	141.61		139	55.4	55.4	0.000136
		0	0.07	ls	rib							355	140.57	141.69		142	56.4	56.4	0.0001041
		0	0.03	si	shl							359	140.71	141.83		145	56.75	56.75	0.0001671
		0	0.05	ls	rib							363	140.84	141.96		145	57.05	57.05	0.0001692
		0	0.1	si	shl		scr					366	141.02	142.14		146	57.35	57.35	0.0001646
		0	0.05	ls	rib							368	143.48	144.6		146	57.95	57.95	0.0001816
		0	0.5	si	shl							378	146.56	147.68		146	58.23	58.23	0.0001051
		0	0.43	si	slt							378	146.77	147.89		152	59	59	0.0001625
		0	0.2	ls	rib							380	146.83	147.95		156	59.3	59.3	0.0001586
		0	0.54	si	shl							380	147	148.12		156	59.6	59.6	0.000164
		0	0.05	ls	rib							381	147.23	148.35		156	59.9	59.9	0.000147
		0	0.49	si	shl							382	152.19	153.31		170	62.4	62.42	0.0001512
		0	0.02	ls	rib							384	152.25	153.37		170	62.64	62.66	0.000133
		0	0.25	si	shl							384	152.57	153.69		171	63.2	63.22	0.0001777
		0	0.02	ls	rib							384	152.79	153.91		171	63.47	63.49	0.0002567
		0	0.24	si	shl							386	159.81	160.93		171	63.72	63.74	0.0002276
		0	0.33	si	slt							386	160.13	161.25		182	66.1	66.12	0.0001242
		0	0.35	ls	strm; oo	mas						386	160.44	161.56		184	67.12	67.14	0.0001352
		0	0.05	ls	oo							388	163.68	164.8		186	67.48	67.5	0.000117
		0	3.76	si	shl				purple			392	169.96	171.08		186	67.5	67.52	0.0001172
		0	0.02	ls	oo	mc						397	182.66	183.78		191	68.2	68.22	0.0001143
		0	3.17	si	shl				purple			399	183.84	184.96		194	68.7	68.72	0.0001382
		0	0.02	ls	mic							401	185.74	186.86		194	69	69.02	0.0001497
		0	1.27	si	shl				purple			403	185.92	187.04		194	69.3	69.32	0.0001486
		0	0.19	ls	oo							405	186.32	187.44		195	69.9	69.92	0.0002435
		0	1.43	si	shl				purple			406	187.18	188.3		196	70.16	70.18	0.0001102
		0	0.18	ls	grn	scs						409	203	204.12		198	70.35	70.37	0.0001001
		0	0.07	ls	rib							409	203.19	204.31		200	70.51	70.53	0.0001612
		0	0.03	si	shl							412	203.93	205.05		210	71.46	71.48	0.0001223
		0	0.08	ls	strm							417	208.51	209.63		210	71.76	71.78	0.000149
		0	1.56	si	shl							417	208.9	210.02		210	72.06	72.08	0.0001649
		0	0.76	si	slt		lod					417	209.24	210.36		210	72.36	72.38	0.0001467
		0	0.16	ls	oo	mas						418	212.16	213.28		210	72.66	72.68	0.0001572
		0	0.12	ls	oo	trg						422	216.58	217.7		210	72.96	72.98	0.0001569
		0	0.35	si	shl				green			431	218.59	219.73		210	73.26	73.28	0.0001375
		0	0.02	si	shl				green			433	219.12	220.26		210	73.56	73.58	0.0001617
		0	0.12	si	shl				green			435	220.09	221.23		218	74.46	74.48	0.0001339
		0	0.71	si	shl				red			436	220.14	221.28		221	74.7	74.72	0.0001192
		0	1.14	si	shl							439	220.24	221.38		223	75.1	75.12	0.000153
		0	0.07	ls	rib							440	220.28	221.42		223	75.4	75.42	0.000136
		0	0.09	si	shl							442	221.12	222.26		223	75.7	75.72	0.0001455
		0	0.05	ls	oo							445	221.31	222.45		224	76	76.02	0.0001425
		0	0.03	si	shl							450	221.49	222.63		225	76.4	76.42	0.0001447
		0	0.02	ls	oo							454	221.58	222.72		226	76.7	76.72	0.0001664
		0	0.36	si	shl				purple			454	221.74	222.88		228	77.6	77.62	0.0001108
		0	0.03	ls	oo							462	221.95	223.09		229	77.76	77.78	0.0001547
		0	0.04	si	shl				purple			464	222.19	223.33		229	78.36	78.38	0.0002594
		0	0.04	ls	oo							466	222.23	223.37		230	78.66	78.68	0.0001315
		0	1.15	si	shl				olive			468	222.39	223.53		230	78.96	78.98	0.000112
		0	0.39	si	slt				olive			470	222.48	223.62		232	79.92	79.94	0.0001359
		0	0.25	ls	oo	crk						472	227.59	228.73		235	81.18	81.2	0.0001474
		0	0.09	si	shl							472	227.75	228.89		235	81.4	81.42	0.0001228
		0	0.06	ls	rib							474	227.83	228.97		236	82.5	82.52	0.0001142
		0	0.12	ls	oo							476	228.02	229.16		241	84.02	84.04	0.0001113
		0	0.07	si	shl							478	228.1	229.24		243	84.32	84.34	0.0001076
	0.02	0.02	0.1	ls	rib							480	228.28	229.42		243	84.62	84.64	0.0001602
		0.02	0.04	ls	oo	trg						482	228.77	229.91		244	84.7	84.72	0.0001666
		0.02	0.09	ls	rib	trg						484	231.46	232.6		245	85	85.02	0.0001399
		0.02	0.07	si	shl							486	232.46	233.6		245	85.3	85.32	9.73e-05
		0.02	0.03	ls	rib							488	233.1	234.24		245	85.66	85.68	0.000116
		0.02	0.01	si	shl							490	233.3	234.44		257	87.11	87.13	9.87e-05
		0.02	0.02	ls	rib							496	238.76	239.9		260	87.92	88.94	0.0001195
		0.02	0.96	COVER								496	239.14	240.28		260	88.22	89.24	0.000138
		0.02	1.12	si	shl				purple			496	239.43	240.57		260	88.52	89.54	0.0001428
		0.02	0.77	si	slt							498	241.65	242.79		260	88.82	89.84	0.0001611
		0.02	0.23	ls	rib	crk						500	242.12	243.26		260	89.04	90.06	0.0001859
		0.02	0.04	si	shl		lod					501	242.16	243.3		260	89.34	90.36	0.0001743
		0.02	0.12	ls	rib	crk						505	242.66	243.8		260	89.64	90.66	0.0001806
		0.02	0.07	si	shl							505	242.78	243.92		260	89.94	90.96	0.0001692
		0.02	0.03	ls	rib							507	243.01	244.15		260	90.24	91.26	0.0001738
		0.02	0.03	ls	oo							509	243.11	244.25		260	90.54	91.56	0.0001692
		0.02	0.02	si	shl							511	243.22	244.36		260	90.84	91.86	0.0001767
		0.02	0.05	ls	oo							514	243.3	244.44		260	91.14	92.16	0.0001815
		0.02	0.88	si	shl				green			516	243.35	244.49		260	91.44	92.46	0.0001578
		0.02	0.87	si	slt	mas			red			520	243.58	244.72		265	92.44	93.46	0.0001254
		0.02	0.12	ls	rib	crk						522	243.62	244.76		265	92.84	93.86	0.0001552
		0.02	0.25	si	shl		lod					525	248.67	249.81		265	93.24	94.26	0.0001648
		0.02	0.2	si	slt	crk						527	254.99	256.13		265	93.64	94.66	0.000163
		0.02	0.3	si	shl							529	255.24	256.38		265	94.04	95.06	0.00016
		0.02	0.16	si	slt							531	255.39	256.53		265	94.44	95.46	0.0001449
		0.02	0.16	ls	oo	mas						533	256.4	257.54		266	94.74	95.76	0.0001449
		0.02	0.04	ls	oo							537	256.67	257.81		266	95.34	96.36	0.0001419
		0.02	0.12	ls	oo	crk						539	256.89	258.03		273	96.36	97.38	0.0001556
		0.02	0.03	si	shl							541	257.09	258.23		273	96.7	97.72	0.0001577
		0.02	0.04	ls	grn							543	257.23	258.37		273	97	98.02	0.0001725
		0.02	0.02	ls	rib							545	257.3	258.44		273	97.3	98.32	0.000179
		0.02	1.06	si	shl				purple			547	257.55	258.69		273	97.6	98.62	0.0001641
		0.02	0.68	si	slt	mas	lod		purple			549	258.86	260		273	97.9	98.92	0.0001051
		0.02	0.13	si	slt	bio						551	259.04	260.18		281	102.15	103.17	0.0001192
		0.02	0.1	ls	rib	crk						553	260.53	261.67		285	105.34	106.36	0.0001579
		0.02	0.03	si	shl							555	260.69	261.83		289	105.64	106.66	0.0001587
		0.02	0.12	ls	rib	crk						557	262.4	263.54		292	105.97	106.89	0.0001621
		0.02	0.11	si	slt	crk			green			561	262.99	264.13		293	106.27	107.19	0.0001158
		0.02	0.02	ls	rib	crk						563	263.23	264.37		294	106.57	107.59	0.0001612
		0.02	0.04	si	shl				purple			565	264.57	265.71		296	106.87	107.89	0.0001697
		0.02	0.01	ls	rib							567	267.39	268.53		296	107.17	108.19	0.0001737
		0.02	0.09	si	shl				purple			569	267.67	268.81		296	107.47	108.49	0.0001515
		0.02	0.05	ls	oo	crk; brc						571	268.83	270.17		296	107.77	108.79	0.0001396
		0.02	0.02	si	shl				purple			573	268.87	270.21		296	108.07	109.09	0.0001427
		0.02	0.02	ls	rib							574	272.87	274.21		296	108.37	109.39	0.0001447
		0.02	0.04	si	shl							575	274.34	275.68		302	109.2	110.12	8.97e-05
		0.02	0.03	ls	rib							579	282.19	283.53		308	109.8	110.72	0.0001076
		0.02	3.14	si	shl				purple			581	283.39	284.73		308	110.1	111.02	9.29e-05
		0.02	0.03	ls	rib							583	285.74	287.08		310	110.87	111.79	9.88e-05
		0.02	0.07	si	shl							585	290.04	291.38		310	111.17	112.09	9.21e-05
		0.02	0.03	ls	rib							585	290.03	291.37		313	111.54	112.46	0.0001449
		0.02	0.1	si	slt							587	290.4	291.74		315	111.69	112.71	0.000102
		0.02	0.02	ls	rib							588	290.59	291.93		318	112.45	113.47	0.0001777
		0.02	0.07	si	shl							589	293.07	294.41		318	112.75	113.77	0.0001503
		0.02	0.04	ls	rib							591	293.34	294.68		318	113.05	114.07	0.0001746
		0.02	0.15	si	shl				purple			593	293.54	294.88		318	113.35	114.37	0.000168
		0.02	0.12	si	shl	skl						594	295.06	296.4		318	113.65	114.67	0.0001538
		0.02	0.08	si	shl				purple			594	297.39	298.73		318	114	115.02	0.0001813
		0.02	0.11	si	shl	skl						595	302.31	303.65		318	114.35	115.37	0.0001626
		0.02	0.12	si	shl							597	302.67	304.01		318	114.85	115.87	0.0001722
		0.02	1.04	si	slt							599	302.96	304.3		318	115.15	116.17	0.0001724
		0.02	0.21	si	shl							603	303.14	304.48		318	115.45	116.47	0.0001558
		0.02	0.33	si	slt	mas			blue-green			607	303.44	304.78		318	115.75	116.77	0.0001532
		0.02	0.48	si	slt	crk			green			610	303.65	304.99		318	116.05	117.07	0.0001525
		0.02	0.46	ls	oo	mas						613	312.5	313.84		318	116.35	117.37	0.0001445
		0.02	0.14	si	shl				blue-green			615	312.6	313.94
		0.02	0.77	si	shl				red			620	313.22	314.86
		0.02	0.82	si	slt				purple			622	313.57	315.2
		0.02	0.64	ls	grn	trg; crk						625	313.69	315.32
		0.02	0.18	si	shl							627	313.72	315.35
		0.02	0.5	ls	rib							629	314.86	316.49
		0.02	0.64	ls	rib	bio						631	315.23	316.86
		0.02	0.38	si	shl				blue-grey			635	318.58	320.21
		0.02	1.01	si	slt	mas			purple			637	319.2	320.83
		0.02	1.36	ls	rib	crk; skl						637	319.28	320.91
		0.02	0.04	si	shl							638	319.59	321.22
		0.02	0.04	ls	rib							639	320.41	322.04
		0.02	0.03	si	shl							641	320.5	322.13
		0.02	0.07	ls	rib	crk; brc						644	320.92	322.55
		0.02	0.08	ls	rib	crk						647	321.06	322.69
		0.02	0.51	si	slt							649	321.18	322.81
		0.02	0.31	si	shl							650	321.27	322.9
		0.02	0.67	si	slt	mas						653	322.08	323.71
		0.02	0.04	ls	rib	crk						655	322.19	323.82
		0.02	0.14	si	slt	crk						657	322.92	324.55
		0.02	0.06	ls	rib							659	323.36	324.99
		0.02	0.02	si	shl							663	323.68	325.41
		0.02	0.18	ls	rib	crk						664	323.83	325.56
		0.02	0.06	si	shl							664	324.06	325.79
		0.02	0.1	ls	oo	skl; crk						665	324.68	326.41
		0.02	0.03	si	shl							668	324.84	326.57
		0.02	0.31	ls	oo	wav						670	331.67	332.81
		0.02	0.07	si	shl							672	331.91	333.05
		0.02	0.18	ls	grn	skl						676	332.13	333.27
		0.02	0.31	si	shl							682	332.35	333.49
		0.02	0.05	ls	oo
		0.02	0.42	ls	rib
	1	1.02	5.12	si	shl				purple
		1.02	0.09	si	slt	mas
		1.02	0.09	ls	oo	mas
		1.02	0.08	ls	grn	skl; brc
		1.02	0.04	ls	grn	vug; mc
		1.02	2.51	si	shl				purple
		1.02	1.23	si	slt	mas			red
		1.02	0.07	ls	mic
		1.02	0.13	ls	oo
		1.02	0.05	ls	grn; oo
		1.02	0.08	ls	oo
		1.02	0.02	si	shl
		1.02	0.03	ls	oo	skl
		1.02	1.87	si	shl				purple
		1.02	0.17	si	slt		lod		green
		1.02	0.49	ls	oo	pln
		1.02	2.52	si	shl				olive
		1.02	0.71	si	shl				green
		1.02	0.03	ls	oo
		1.02	0.06	si	shl				green
		1.02	0.05	ls	rib
		1.02	0.86	si	shl				green
		1.02	0.11	ls	oo
		1.02	0.21	ls	grn
		1.02	0.03	ls	oo
		1.02	2.16	si	shl				purple
		1.02	0.04	ls	mic
		1.02	0.11	si	shl				purple
		1.02	0.03	ls	mic
		1.02	0.11	si	shl				purple
		1.02	0.04	ls	mic
		1.02	0.13	si	shl				purple
	-0.1	0.92	0.2	ls
		0.92	0.29	si	shl
	0.1	1.02	0.27	si	shl
		1.02	0.02	ls	rib
		1.02	1.71	si	shl				green
		1.02	0.04	ls	mic
		1.02	0.16	si	shl
		1.02	0.05	ls	mic
		1.02	0.08	si	shl
		1.02	0.32	ls	mic	mas
	-0.1	0.92	0.14	si	shl				purple
		0.92	0.09	ls	mic
		0.92	0.33	si	shl
		0.92	0.02	ls	oo
		0.92	0.04	si	shl
		0.92	0.04	ls	mic
		0.92	0.68	si	shl				green
		0.92	0.18	ls	grn	vug; mc; bio
		0.92	0.67	si	shl				green
		0.92	0.05	ls	mic
		0.92	0.02	ls	rib
		0.92	0.28	si	slt				black
		0.92	0.02	ls	rib
	0.1	1.02	0.2	si	shl
		1.02	0.05	ls	mic
		1.02	0.01	ls	oo
		1.02	4.61	si	shl				purple
		1.02	0.13	ls	mic
		1.02	0.14	si	shl
		1.02	0.09	ls	mic
		1.02	0.25	si	shl				grey
		1.02	0.02	ls	rib
		1.02	0.07	si	shl
		1.02	0.04	ls	rib	vug
		1.02	0.01	si	shl
		1.02	0.03	ls	rib
		1.02	4.05	si	shl				purple
		1.02	0.07	ls	mic
		1.02	0.62	si	shl				purple
		1.02	0.03	ls	mic
		1.02	0.05	si	shl				purple
		1.02	0.02	ls	rib
		1.02	0.02	si	shl				purple
		1.02	0.06	ls	rib
		1.02	0.91	si	shl				purple
		1.02	0.01	ls	rib
		1.02	0.02	si	shl				purple
		1.02	0.02	ls	rib
		1.02	0.05	si	shl				purple
		1.02	0.01	ls	rib
		1.02	0.05	si	shl				purple
		1.02	0.03	ls	rib
		1.02	9.61	si	shl				purple
		1.02	0.02	ash	ash			ash sample
		1.02	1.92	si	shl				purple
		1.02	0.41	si	slt	mc; crk
		1.02	0.24	si	shl
		1.02	0.13	ls	oo
		1.02	3.04	si	shl				grey
		1.02	0.01	ls	rib
		1.02	1.83	si	shl				green
	0.1	1.12	0.16	ls	oo
		1.12	0.02	si	shl
		1.12	0.05	ls	rib
		1.12	0.02	si	shl
		1.12	0.02	ls	oo
		1.12	0.05	si	shl
		1.12	0.03	ls	rib
		1.12	0.04	si	shl
		1.12	0.02	ls	rib
		1.12	0.05	si	slt				grey
		1.12	0.05	ls	rib
		1.12	0.03	si	shl				grey
		1.12	0.05	ls	oo
		1.12	0.08	ls	oo
		1.12	2.42	si	shl				blue-green
		1.12	0.05	ls	oo
		1.12	0.15	si	shl				black
		1.12	0.02	ls	rib
		1.12	0.21	si	shl				black
		1.12	0.24	ls	strm
		1.12	0.73	si	shl				black
		1.12	0.02	ls	grn; oo	skl
		1.12	0.01	si	shl
		1.12	0.02	ls	oo	skl
		1.12	1.63	si	shl				green
		1.12	0.25	ls	oo	pln
		1.12	0.02	si	shl
		1.12	0.44	ls	oo	trg
		1.12	4.92	si	shl				purple
		1.12	0.04	ls	oo
		1.12	0.02	si	shl
		1.12	0.58	ls	oo	trg
		1.12	6.98	si	shl				purple
		1.12	0.67	ls	oo	trg		dip slope marker bed
		1.12	3.21	si	shl				purple
		1.12	0.02	ls	rib	skl
		1.12	0.18	si	shl				blue-green
		1.12	0.02	ls	rib
		1.12	6.02	si	shl				purple
		1.12	0.1	ls	oo
		1.12	0.01	si	shl
		1.12	0.24	ls	oo
		1.12	11.66	si	shl				purple
		1.12	0.69	si	shl
		1.12	0.07	ls	mic
		1.12	1.15	si	shl				purple
		1.12	0.02	ash	ash			ash sample
		1.12	2.17	si	shl				purple
		1.12	0.02	si	shl				green
		1.12	0.16	si	shl				purple
		1.12	0.02	ash	ash			ash sample
		1.12	0.38	si	shl				purple
		1.12	0.02	ls	mic
		1.12	1.85	si	shl				purple
		1.12	7.51	si	shl				purple
		1.12	7	si	shl				blue-grey
		1.12	0.23	ls	grn
		1.12	0.43	si	shl
		1.12	0.26	ls	wk
		1.12	0.06	ls	oo	skl
		1.12	0.21	ls	wk
		1.12	3.94	si	shl				purple
		1.12	0.38	si	shl				green
		1.12	0.77	ls	mic	vug
		1.12	2.89	si	shl				purple
		1.12	0.02	ash	ash			ash
		1.12	3.39	si	shl				purple
		1.12	0.01	ls	mic	hg
		1.12	1	si	shl				blue-green
		1.12	0.01	ls	mic	hg
	0.02	1.14	0.1	si	shl				grey
		1.14	0.01	ls	mic	hg
		1.14	0.05	si	shl
		1.14	0.01	ls	mic	hg
		1.14	0.01	si	shl
		1.14	0.07	ls	mic	hg
		1.14	0.8	si	shl				purple
		1.14	0.95	si	shl				purple
		1.14	0.05	ls	mic	hg
		1.14	0.49	si	shl
		1.14	0.03	ls	rib	hg
		1.14	0.94	si	shl	vug			purple
		1.14	0.03	ls	mic	hg
		1.14	0.06	ls	pk
		1.14	0.03	ls	mic	vug; skl
		1.14	0.03	si	shl				blue-grey
		1.14	0.04	ls	mic	hg
		1.14	0.03	ls	pk	skl
		1.14	0.81	si	shl				purple
		1.14	0.04	ls	rib
		1.14	0.02	si	shl				purple
		1.14	0.02	ls	mic	vug
		1.14	0.11	si	shl				purple
		1.14	0.08	ls	mic
		1.14	0.01	si	shl
		1.14	0.09	ls	mic
		1.14	0.01	si	shl
		1.14	0.02	ls	mic
		1.14	0.01	si	shl
		1.14	0.04	ls	mic
		1.14	0.01	si	shl
		1.14	0.2	ls	mic
		1.14	0.01	si	shl
		1.14	0.02	ls	mic
		1.14	0.01	si	shl
		1.14	0.1	ls	mic
		1.14	0.01	si	shl
		1.14	0.02	ls	mic
		1.14	0.01	si	shl
		1.14	0.03	ls	grn
		1.14	0.19	si	shl				purple
		1.14	0.02	si	shl	vug			purple
		1.14	0.02	si	shl				purple
		1.14	0.06	ls	mic	vug
		1.14	0.09	si	shl
		1.14	0.08	ls	mic	vug
		1.14	0.03	si	shl
		1.14	0.03	ls	grn	vug
		1.14	5.08	si	shl				purple
		1.14	0.2	ls	rib	fnlam
		1.14	0.04	si	shl
		1.14	0.04	ls	grn
		1.14	0.16	si	shl				purple
		1.14	0.02	ls	oo
		1.14	0.05	si	shl
		1.14	0.04	ls	rib	fnlam
		1.14	0.09	si	shl
		1.14	0.17	ls	oo
		1.14	0.38	si	shl
		1.14	0.02	ls	rib
		1.14	2.66	si	shl				purple
		1.14	0.04	ls	rib
		1.14	0.93	si	shl				blue-grey
		1.14	0.1	ls	rib
		1.14	0.56	si	shl				black
		1.14	0.08	ls	mic
		1.14	0.13	si	shl
		1.14	0.03	ls	mic
		1.14	0.15	si	shl
		1.14	0.01	ls	rib
		1.14	4.84	si	shl
		1.14	0.16	si	shl
		1.14	0.27	si	shl
		1.14	0.71	ls	rib
		1.14	2.14	si	shl				green
		1.14	0.13	ls	mic
		1.14	0.32	si	shl				black
		1.14	0.1	ls	grn
		1.14	0.03	ls	mic	hg
		1.14	0.08	si	shl				black
		1.14	0.15	si	shl				black
		1.14	0.24	si	shl		lod		black
		1.14	0.16	ls	mic	hg
		1.14	0.2	si	shl				black
		1.14	0.02	ls	rib
		1.14	0.06	si	shl		lod		black
		1.14	0.06	ls	rib
		1.14	0.01	si	shl				black
		1.14	0.09	ls	grn
		1.14	0.02	si	shl
		1.14	0.02	si	shl
		1.14	0.03	ls	rib	vug
		1.14	0.02	si	shl
		1.14	0.03	ls	mic	skl
		1.14	0.02	si	shl				black
		1.14	0.17	ls	mic
		1.14	0.02	si	shl				black
		1.14	0.01	ls	mic
		1.14	0.02	si	shl				black
		1.14	0.22	ls	rib
		1.14	4.39	si	shl				grey
		1.14	0.4	si	shl				black
		1.14	0.12	ls	mic
		1.14	6.24	si	shl				grey
		1.14	0.04	ls	mic	hg
		1.14	0.14	si	shl
		1.14	0.13	ls	mic
		1.14	0.05	si	shl
		1.14	0.17	ls	rib	vug
		1.14	0.8	si	shl				grey
		1.14	0.2	ls	mic
		1.14	0.01	si	shl
		1.14	0.05	ls	mic
		1.14	0.03	si	shl
		1.14	0.09	ls	mic
		1.14	0.08	si	shl				black
		1.14	0.26	ls	mic
		1.14	0.06	si	shl
		1.14	0.02	ls	rib
		1.14	0.12	si	shl
		1.14	0.02	ls	rib
		1.14	0.04	si	shl
		1.14	0.04	ls	mic
		1.14	0.15	si	shl
		1.14	0.1	si	shl
		1.14	1.28	si	shl
		1.14	0.01	ls	rib
		1.14	0.17	si	shl
		1.14	0.02	ls	rib
		1.14	1.47	si	shl
		1.14	0.03	ls	rib
		1.14	0.13	si	shl
		1.14	0.02	ls	rib	skl
		1.14	1.69	si	shl
		1.14	0.01	ls	mic
		1.14	0.4	si	shl
		1.14	0.02	ls	rib
		1.14	0.16	si	shl
		1.14	0.02	ls	rib
		1.14	0.21	si	shl
		1.14	0.03	ls	grn	trg
		1.14	1.31	si	shl
		1.14	0.03	ls	grn			Interesting bed. Green and black grains, some micaceous grains. Mud cracks?
		1.14	2.8	si	shl
		1.14	0.02	ls	rib	trg
		1.14	0.24	si	shl
		1.14	0.13	ls	grn	skl; mc
	0.2	1.34	1.25	si	shl
		1.34	0.02	ls	rib
		1.34	0.02	si	shl
		1.34	0.02	ls	rib	skl
		1.34	5.4	si	shl
		1.34	0.08	ls	mic
		1.34	7.64	si	shl
		1.34	0.03	ls	rib
		1.34	0.11	si	shl
		1.34	0.09	ls	mic
		1.34	1.11	si	shl
		1.34	0.09	ls	mic
		1.34	2.24	si	shl
		1.34	0.08	ls	rib
		1.34	4.27	si	shl
		1.34	0.05	ls	rib
		1.34	0.32	si	shl
		1.34	0.02	ls	mic
		1.34	2.63	si	shl
		1.34	0.05	ls	mic	hg
		1.34	0.22	si	shl
		1.34	0.05	ls	rib			sulfides?
		1.34	0.17	si	shl
		1.34	0.02	ls	rib			sulfides?
		1.34	8.74	si	shl			supposedly an ash sample?	purple
		1.34	0.04	ls	mic	vug
		1.34	0.32	si	shl
		1.34	0.03	ls	rib
		1.34	0.25	si	shl
		1.34	0.06	ls	mic
		1.34	0.08	si	shl
		1.34	0.01	ls	rib
		1.34	0.04	si	shl
		1.34	0.03	ls	rib
		1.34	0.05	si	shl
		1.34	0.02	ls	rib
		1.34	0.21	si	shl
		1.34	0.03	ls	grn
		1.34	0.08	ls	rib
		1.34	0.08	ls	oo
		1.34	0.04	ls	rib
		1.34	0.01	ls	oo
		1.34	8.81	si	shl
		1.34	0.03	ls	rib
		1.34	0.08	si	shl
		1.34	0.02	ls	rib
	0.3	1.64	0.38	si	shl		lod
		1.64	0.03	ls	mic
		1.64	0.14	ls	strm
		1.64	0.26	si	shl
		1.64	0.15	ls	mic
	-0.01	1.63	0.24	si	shl
		1.63	0.07	ls	rib
		1.63	0.03	si	shl
		1.63	0.03	ls	rib
		1.63	0.04	ls	oo	skl
		1.63	0.02	si	shl
		1.63	0.02	ls	rib
		1.63	1.07	si	shl
		1.63	0.13	si	shl			sulfides
		1.63	0.27	si	shl
		1.63	0.05	ls	gw			graywacke?
		1.63	3.21	si	shl				green
		1.63	0.01	ls	grn	skl
		1.63	0.08	ls	mic
		1.63	0.05	si	rib	trg
		1.63	0.56	si	shl				green
		1.63	0.13	ls	mic
		1.63	1.09	si	shl				green
		1.63	0.06	ls	mic
		1.63	0.04	si	shl
		1.63	0.03	ls	gw			graywacke? Micaceous grains
		1.63	0.35	si	shl
		1.63	0.02	ls	grn
		1.63	0.05	ls	mic
		1.63	0.03	ls	rib	trg
		1.63	0.07	si	shl
		1.63	0.05	ls	mic
		1.63	0.07	si	shl
		1.63	0.06	ls	mic
		1.63	0.2	si	shl
		1.63	0.07	ls	grn	skl
		1.63	0.57	si	shl
		1.63	0.05	ls	grn	skl
		1.63	0.07	si	shl
		1.63	0.09	ls	mic
		1.63	0.58	si	shl
		1.63	0.45	ls	mic
		1.63	0.06	si	shl
		1.63	0.03	ls	rib
		1.63	0.02	si	shl
		1.63	0.02	ls	rib
		1.63	0.29	si	shl
	0.1	1.73	0.09	ls	grn	skl
		1.73	0.95	si	shl
		1.73	0.06	ls	oo
		1.73	0.11	si	shl
		1.73	0.01	ls	rib		scr
		1.73	0.02	ls	oo			weird silver pocket see photo
	0.01	1.74	6.21	si	shl
	-0.6	1.14	0.04	ls	mic
		1.14	0.2	si	shl
		1.14	0.1	ls	grn	skl
		1.14	0.02	si	shl
		1.14	0.03	ls	oo	vug; skl
		1.14	0.05	si	shl
		1.14	0.06	ls	mic
		1.14	0.02	si	shl
		1.14	0.03	ls	rib
		1.14	0.04	si	shl
		1.14	0.06	ls	mic
		1.14	0.03	si	shl
		1.14	0.12	ls	mic
		1.14	0.02	si	shl
		1.14	0.18	ls	rib
		1.14	0.2	si	shl				black
		1.14	0.04	ls	grn
		1.14	0.21	si	shl				black
		1.14	0.07	ls	rib
		1.14	0.52	si	shl				black
		1.14	0.04	ls	rib
		1.14	0.29	si	shl				black
		1.14	0.05	ls	rib	fnlam
		1.14	0.68	si	shl				black
		1.14	0.04	ls	rc
		1.14	0.25	si	shl				black
		1.14	0.03	ls	mic	hg
		1.14	0.45	si	shl				black
		1.14	0.02	ls	mic
		1.14	0.06	si	shl				black
		1.14	0.03	ls	rib
		1.14	0.28	si	shl				black
		1.14	0.07	ls	rib
		1.14	0.94	si	shl				black
		1.14	0.05	ls	rib
		1.14	0.97	si	shl				grey
		1.14	0.04	ls	rib
		1.14	0.49	si	shl				grey
		1.14	0.06	ls	rib
		1.14	0.57	si	shl				grey
		1.14	0.02	ls	rib
		1.14	0.74	si	shl				grey
		1.14	0.06	ls	rib
		1.14	0.32	si	shl				grey
		1.14	0.05	ls	rib
		1.14	0.15	si	shl				grey
		1.14	0.02	ls	rib
		1.14	0.28	si	shl				grey
		1.14	0.06	ls	rib	vug; skl
		1.14	0.02	si	shl
		1.14	0.04	ls	rib	vug; skl
		1.14	0.97	si	shl				grey
		1.14	0.04	ls	rib
		1.14	0.09	si	shl
		1.14	0.05	ls	rib
		1.14	0.35	si	shl				grey
		1.14	0.03	ls	rib
		1.14	1.3	si	shl				grey
		1.14	0.09	ls	rib
		1.14	0.29	si	shl				grey
		1.14	0.01	ls	mic	hg
		1.14	0.03	ls	rib
		1.14	1.73	si	shl				grey
		1.14	0.02	ls	rib
		1.14	1.11	si	shl				grey
		1.14	0.02	ls	rib
		1.14	0.51	si	shl				grey
		1.14	0.14	ls	mic
		1.14	0.17	ls	rib
		1.14	0.03	ls	rib	vug; skl
		1.14	0.04	ls	rib
		1.14	1.22	si	shl				grey
		1.14	0.05	ls	mic	skl
		1.14	0.05	ls	mic
		1.14	0.33	si	shl				grey
		1.14	0.92	ls	mic
		1.14	1.26	si	shl				grey
		1.14	0.02	ls	mic			beef calcite
		1.14	1.31	si	shl				grey
		1.14	0.06	ls	rib
		1.14	0.04	si	shl				grey
		1.14	0.07	ls	rib			sulfides
		1.14	0.02	si	shl				grey
		1.14	0.08	ls	rib	vug
		1.14	0.9	si	shl				grey
		1.14	0.1	ls	mic	hg
		1.14	0.16	si	shl				grey
		1.14	0.04	ls	mic	vug
		1.14	0.17	si	shl				grey
		1.14	0.02	ls	mic
		1.14	0.01	ls	mic			beef calcite
		1.14	0.41	si	shl				grey
		1.14	0.04	ls	rib
		1.14	11.19	si	shl				olive
		1.14	0.24	ls	mic
		1.14	0.21	si	shl				grey
	-0.67	0.47	0.76	ls	rib	trg
		0.47	4.3	si	shl				grey
		0.47	0.12	ls	mic
		0.47	0.28	si	shl				grey
		0.47	0.94	ls	rib	trg
		0.47	0.2	si	shl
		0.47	0.02	ls	rib
		0.47	0.18	si	shl				olive
		0.47	0.04	ls	rib
		0.47	0.3	si	shl
		0.47	0.02	ls	rib	vug
		0.47	0.03	si	shl
		0.47	0.02	ls	rib	vug; hg
		0.47	0.04	si	shl
		0.47	0.02	ls	rib	vug; hg
		0.47	0.04	si	shl
		0.47	0.04	ls	rib	vug; hg
		0.47	5.34	si	shl				olive
		0.47	0.09	ls	rib
		0.47	0.49	si	shl				olive
		0.47	0.07	ls	rib
		0.47	0.17	si	shl				olive
		0.47	0.05	ls	rib	skl
		0.47	0.41	si	shl				olive
		0.47	0.03	ls	rib
		0.47	0.05	si	shl				olive
		0.47	0.02	ls	rib
		0.47	0.21	si	shl				olive
		0.47	0.02	ls	rib
		0.47	0.2	si	shl				olive
		0.47	0.05	ls	rib
		0.47	3.23	si	shl				olive
		0.47	0.02	ls	rib
		0.47	4.78	si	shl				purple
		0.47	0.04	ls	mic	hg		trace
		0.47	0.1	ls	mic
		0.47	0.32	si	shl				grey
		0.47	0.05	ls	mic	hg
		0.47	0.06	si	shl				olive
		0.47	0.06	ls	mic	hg
		0.47	0.21	si	shl				grey
		0.47	0.04	ls	mic	hg
		0.47	0.23	si	shl				grey
		0.47	0.04	ls	mic	hg
		0.47	0.05	si	shl				black
		0.47	0.06	ls	rib
		0.47	0.09	si	shl				black
		0.47	0.02	ls	mic	hg
		0.47	0.06	si	shl				black
		0.47	0.06	ls	mic	hg
		0.47	6.11	si	shl				purple
		0.47	0.52	ls	rib
		0.47	0.05	si	shl				blue-green
		0.47	0.01	ls	rib
		0.47	0.03	si	shl				blue-green
		0.47	0.06	ls	rib
		0.47	0.11	si	shl				purple
		0.47	0.08	ls	rib
		0.47	1.1	si	shl				purple
		0.47	0.05	ls	rib
		0.47	0.22	si	shl				purple
		0.47	0.05	ls	rib
		0.47	0.15	si	shl				purple
		0.47	0.05	ls	rib
		0.47	0.54	si	shl				purple
		0.47	0.05	ls	rib	trg; skl
		0.47	3.25	si	shl			risoliths?	purple
		0.47	1.6	si	shl			mixed purple and green, see photo	purple
		0.47	0.05	ls	rib
		0.47	0.22	si	shl				olive
		0.47	0.12	ls	grn
		0.47	0.12	ls	rib
		0.47	0.13	ls	grn	trg
		0.47	0.21	ls	rib
		0.47	0.06	ls	rib	trg
		0.47	0.12	ls	rib
		0.47	0.13	ls	grn
		0.47	0.17	ls	rib
		0.47	0.03	ls	rib	trg
		0.47	0.11	ls	rib
		0.47	0.04	ls	grn	trg
		0.47	0.05	ls	rib
		0.47	0.03	ls	oo			channels, weird matted matrix
		0.47	0.6	si	shl				grey
		0.47	0.05	ls	rib
		0.47	4.96	si	shl				olive
		0.47	0.22	ls	rib
		0.47	0.05	si	shl				grey
		0.47	0.06	ls	rib
		0.47	0.33	si	shl
		0.47	0.04	ls	rib
		0.47	0.07	ls	grn	mas; skl
		0.47	0.36	si	shl				blue-green
		0.47	0.04	ls	oo
		0.47	0.15	si	shl				grey
		0.47	0.06	ls	oo			matted matrix
		0.47	1.31	si	shl				blue-green
		0.47	0.17	ls	wk	skl
		0.47	0.08	si	shl				grey
		0.47	0.08	ls	mic
		0.47	0.08	si	shl				grey
		0.47	0.01	ls	rib
		0.47	0.07	si	shl				grey
		0.47	0.03	ls	rib	skl		sulfides?
		0.47	0.75	si	shl				blue-green
		0.47	0.13	ls	oo	vug; skl; mc; bio
		0.47	0.96	si	shl
		0.47	0.08	ls	rib	mc		sulfides?
		0.47	1.58	ls	rib			sulfides
		0.47	7.31	si	shl				purple
		0.47	0.06	ls	mic
		0.47	0.03	si	shl				brown
		0.47	0.08	ls	rib	fnlam
		0.47	0.05	ls	rib
		0.47	1.81	si	shl				purple
		0.47	0.01	ls	oo
		0.47	0.08	si	shl				purple
		0.47	0.01	ls	grn
		0.47	0.07	si	shl				purple
		0.47	0.03	ls	rib			metatllic looking grains?
		0.47	3.24	si	shl				purple
		0.47	1.13	si	shl				grey
		0.47	0.14	ls	rib
		0.47	0.19	ls	rib
		0.47	0.15	ls	grn	trg
		0.47	1.39	si	shl				olive
		0.47	0.09	ls	rib
		0.47	0.34	si	shl				olive
		0.47	0.42	ls	grn	skl; mc
		0.47	0.82	si	shl				olive
		0.47	0.04	ls	mic
		0.47	1.58	si	shl				olive
		0.47	0.08	ls	rib
		0.47	2.38	si	shl				olive
		0.47	0.01	ls	rib
		0.47	0.13	si	shl				blue-green
		0.47	0.05	ls	rib
		0.47	0.12	si	shl				blue-green
		0.47	0.01	ls	rib
		0.47	0.24	si	shl				green
		0.47	0.03	ls	rib
		0.47	0.1	si	shl				blue-green
		0.47	0.07	ls	rib
		0.47	0.06	si	shl
		0.47	0.02	ls	rib
		0.47	0.84	si	shl				green
		0.47	0.03	ls	rib
		0.47	0.24	si	shl				olive
		0.47	0.04	ls	rib
		0.47	0.28	si	shl				olive
		0.47	0.02	ls	mic
		0.47	0.24	si	shl				olive
		0.47	0.04	ls	mic
		0.47	0.13	si	shl				mustard
		0.47	0.03	ls	rib	trg
		0.47	0.75	si	shl				olive
		0.47	0.05	ls	rib
		0.47	1.8	si	shl				green
		0.47	0.01	ls	rib
		0.47	0.6	si	shl				olive
		0.47	0.02	ls	rib
		0.47	2.07	si	shl				grey
		0.47	0.05	ls	rib
		0.47	0.01	si	shl
		0.47	0.02	ls	rib
		0.47	3.46	si	shl				purple
		0.47	6	si	shl				purple
		0.47	0.04	ls	rib
		0.47	0.24	si	shl				purple
		0.47	0.03	ls	rib
		0.47	0.41	si	shl				purple
		0.47	0.03	ls	rib	trg
		0.47	0.42	si	shl				purple
		0.47	0.06	ls	rib	mc
		0.47	0.23	si	shl				purple
		0.47	0.07	ls	rib
		0.47	4.03	si	shl				purple
		0.47	0.02	qtz	smd
		0.47	1.47	si	shl				purple
		0.47	0.02	ls	rib
		0.47	1.9	si	shl				purple
		0.47	0.02	ls	rib
		0.47	2.55	si	shl				purple
		0.47	0.08	ls	grn
		0.47	0.08	si	shl				green
		0.47	0.05	ls	rib
		0.47	2.98	si	shl				purple
		0.47	0.02	ls	rib
		0.47	0.79	si	shl				purple
		0.47	0.02	ls	rib
		0.47	3.94	si	shl				purple
		0.47	0.16	ls	rib	mc; skl
		0.47	1.49	si	shl				purple
		0.47	0.03	ls	rib
		0.47	0.22	si	shl				purple
		0.47	0.04	ls	rib
		0.47	0.2	si	shl				purple
		0.47	0.02	ls	rib	mc
		0.47	0.43	si	shl				blue-green
		0.47	0.02	ls	rib
		0.47	0.1	si	shl				grey
		0.47	0.04	ls	gw	mc		matted textur, white iridescent crystals
		0.47	0.16	si	shl				purple
		0.47	0.05	si	sfn	pln
		0.47	2.44	si	shl				purple
		0.47	0.05	ls	rib
		0.47	1.11	si	shl				purple
		0.47	0.43	si	shl	crk			green
		0.47	0.09	ash	ash	vug		pumice ash sample
		0.47	0.02	ls	rib
		0.47	1.54	si	shl				purple
		0.47	0.02	ls	rib
		0.47	0.28	si	shl				purple
		0.47	0.14	ls	rib
		0.47	2.69	si	shl				purple
		0.47	0.24	ls	slt	crk
		0.47	0.16	si	shl
		0.47	0.13	ls	slt
		0.47	0.06	si	shl				grey
		0.47	0.08	ls	mic
		0.47	0.04	si	shl				grey
		0.47	0.1	ls	rc
		0.47	0.19	si	shl				grey
		0.47	0.03	ls	grn
		0.47	0.15	si	shl		lod
		0.47	0.2	ls	grn
		0.47	0.2	si	shl				olive
		0.47	0.19	ls	rib
		0.47	2.01	si	shl				green
		0.47	0.04	ls	rib
	-0.1	0.37	0.48	si	shl				green
		0.37	0.06	ls	rib
		0.37	0.46	si	shl				green
		0.37	0.03	ls	rib
		0.37	0.09	si	shl
		0.37	0.01	ls	rib
		0.37	0.03	si	shl
		0.37	0.01	ls	rib
		0.37	0.01	si	shl
		0.37	0.04	ls	rib
		0.37	0.07	si	shl
		0.37	0.24	ls	grn
		0.37	0.02	si	shl
		0.37	0.03	ls	rib
		0.37	3.53	si	shl				grey
		0.37	0.04	ls	rib
		0.37	0.04	si	shl
		0.37	0.08	ls	rib
		0.37	1.65	si	shl				olive
		0.37	0.1	ls	rib
		0.37	0.13	si	shl				green
		0.37	0.95	ls	rib
		0.37	0.04	si	shl
		0.37	0.09	ls	grn
		0.37	0.04	si	shl
		0.37	0.17	ls	rib
		0.37	0.01	si	shl
		0.37	0.01	ls	rib
		0.37	3.97	si	shl				red
		0.37	3.3	si	shl				grey
		0.37	0.11	ls	grn
		0.37	0.06	si	shl				grey
		0.37	0.02	ls	rib
		0.37	0.02	si	shl
		0.37	0.05	ls	grn
		0.37	0.12	si	shl				grey
		0.37	0.19	ls	grn
		0.37	0.11	si	shl				grey
		0.37	0.03	ls	grn
		0.37	0.02	si	shl
		0.37	0.17	ls	grn
		0.37	0.62	si	shl		lod
		0.37	0.17	ls	grn	trg
		0.37	3.4	si	shl				red
		0.37	0.1	ls	grn	brc
		0.37	0.02	si	shl				grey
		0.37	0.05	ls	grn	vug; trg
		0.37	2.24	si	shl				grey
		0.37	0.09	ls	mic	vug
		0.37	5.07	si	shl				purple
		0.37	0.02	ls	grn
		0.37	0.06	si	shl				green
		0.37	0.1	ls	grn	vug
		0.37	0.04	si	shl		lod		olive
		0.37	0.07	ls	rib	vug		metallic grains and abundant vugs
		0.37	0.13	si	shl				black
		0.37	0.08	ls	grn	vug
		0.37	0.1	si	shl				grey
		0.37	0.05	ls	grn	vug
		0.37	0.08	si	shl		lod		grey
		0.37	0.06	ls	rib	vug
		0.37	0.11	si	shl		lod		grey
		0.37	0.07	ls	rib
		0.37	0.06	ls	grn	vug
		0.37	1.65	si	shl				grey
		0.37	7.21	si	shl				red
		0.37	0.08	ls	grn	brc
		0.37	0.03	si	shl
		0.37	0.04	ls	rib
		0.37	0.02	si	shl
		0.37	0.05	ls	rib	brc
		0.37	0.12	si	shl				grey
		0.37	0.18	ls	rib
		0.37	0.04	si	shl				grey
		0.37	0.02	ls	rib	vug
		0.37	9.35	si	shl				purple
		0.37	0.01	ls	rib
		0.37	0.07	si	shl				grey
		0.37	0.08	ls	mic	vug
		0.37	0.04	ash	ash			ash sample, chalky and white but also fizzy
		0.37	0.03	si	shl
		0.37	0.09	ls	rib
		0.37	7.08	si	shl				purple
		0.37	0.06	ls	grn	brc
		0.37	0.04	si	shl				grey
		0.37	0.27	ls	grn	brc
		0.37	0.12	si	shl				grey
		0.37	0.4	ls	grn	vug; mas
		0.37	10.3	si	shl				purple
		0.37	6.25	si	shl				red
		0.37	5.73	si	shl				green
		0.37	0.23	ls	mic			sulfides
		0.37	3.21	si	shl				olive
